# Supplementary material for: Meteorological conditions during the ACLOUD/PASCAL field campaign near Svalbard in early summer 2017
Source: Copernicus journal article supplement (doi:10.5194/acp-18-17995-2018), 2018-12-18
Supplement: Supplementary file 1 [file acp-18-17995-2018-supplement.zip]

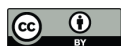

## *Supplement of*

# **Meteorological conditions during the ACLOUD/PASCAL field campaign near Svalbard in early summer 2017**

**Erlend M. Knudsen et al.**

*Correspondence to:* Erlend M. Knudsen (eknudsen@uni-koeln.de)

- acp-18-17995-2018-supplement-title-page.pdf
- Knudsen-et-al\_supplement-version3
  - .DS\_Store
  - Bozem-Kunkel\_Fig7.py
  - Crewell-Mech\_Fig11\_1.py
  - Crewell-Mech\_Fig11\_2.py
  - Crewell-Mech\_Fig11\_3.py
  - Crewell-Mech\_FigA3.py
  - Dahlke\_Fig4ab.m
  - Dahlke\_Fig4cd-Fig5.m
  - Dahlke\_Fig8.m
  - Gorodetskaya-Viceto\_FigA1a.m
  - Gorodetskaya-Viceto\_FigA1b.m
  - Gorodetskaya-Viceto\_FigA1c.m
  - Gorodetskaya-Viceto\_FigA1d.m
  - Heinold\_Fig12\_1.sh
  - Heinold\_Fig12\_2.ncl
  - Heinold\_Fig12\_3.ncl
  - Heinold\_Fig12\_4.ncl
  - Heinold\_Fig14\_1.sh
  - Heinold\_Fig14\_2.sh
  - Heinold\_Fig14\_3.ncl
  - Heinold\_Fig14\_4.ncl
  - Heinold\_Fig14\_5.ncl

- Heinold\_Fig14\_6.ncl
- Heinold\_Fig6\_1.sh
- Heinold\_Fig6\_2.sh
- Heinold\_Fig6\_3.ncl
- Heinold\_FigA2\_1.sh
- Heinold\_FigA2\_2.ncl
- Heinold\_FigA2\_3.ncl
- Heygster\_Fig10-Fig13\_1.py
- Heygster\_Fig10-Fig13\_2.py
- Heygster\_Fig10-Fig13\_3.py
- Heygster\_Fig10-Fig13\_4.py
- Knudsen\_Fig2\_1.m
- Knudsen\_Fig2\_2.m
- Knudsen\_Fig9-VideoS1-VideoS2\_1.m
- Knudsen\_Fig9-VideoS1-VideoS2\_2.m
- Video\_S1.mp4
- Video\_S2.mp4

The copyright of individual parts of the supplement might differ from the CC BY 4.0 License.
